# Supplementary material
Source: Elsevier journal article supplement (https://authors.library.caltech.edu/53888/3/mmc2.xlsx)
Supplement: mmc2 [file mmc2.xlsx]

## Sheet: Sheet1
Table S2. Plasmids used in this study
Plasmid	Relevant features	Origin, marker	Reference or source
pBAD/Myc-His A	Vector	pBR322, AmpR	Invitrogen
pZA31-lucNB	Vector	p15A, CmR	(Levine et al., 2007)
pZE12G	Vector	ColE1, AmpR	(Levine et al., 2007)
pLF126	pZA31-Vh Qrr3	p15A, CmR	(Shao et al., 2013)
pLF2425	pZA31-Vh Qrr3mut	p15A, CmR	this study
pLF128	pZE12G-luxR-gfp	ColE1, AmpR	(Shao et al., 2013)
pLF129	pZE12G-luxO-gfp	ColE1, AmpR	this study
pLF254	pZE12G-luxM-gfp	ColE1, AmpR	this study
pLF255	pZE12G-aphA-gfp	ColE1, AmpR	(Shao et al., 2013)
pLF343	pBAD/Myc-His A-control RBS-mCherry-Kanr	pBR322, KanR	this study
pLF347	pBAD/Myc-His A-aphA-mCherry-Kanr	pBR322, KanR	this study
pLF518	pZE12G-luxR-gfp-control RBS-mCherry	ColE1, AmpR	this study
pLF521	pZE12G-luxR-gfp-luxM-mCherry	ColE1, AmpR	this study
pLF523	pZE12G-luxR-gfp-luxO-mCherry	ColE1, AmpR	this study
pLF519	pZE12G-luxR-gfp-luxR-mCherry	ColE1, AmpR	this study
pLF473	pZE12G-luxO-gfp-luxM-mCherry	ColE1, AmpR	this study
pLF526	pZE12G-luxM-gfp-luxM-mCherry	ColE1, AmpR	this study
pLF507	pZE12G-luxO-gfp-luxR-mCherry*	ColE1, AmpR	this study
pLF537	pZE12G-luxO-gfp-luxM-mCherry*	ColE1, AmpR	this study
pLF1481	pZE12G-luxR-gfp-aphA-mCherry	ColE1, AmpR	this study
pLF2197	pZE12G-luxR-gfp-luxM miniRNA	ColE1, AmpR	this study
pLF2199	pZE12G-luxR-gfp-luxR miniRNA	ColE1, AmpR	this study
pLF2200	pZE12G-luxR-gfp-luxM SL1,2 to SL2 miniRNA	ColE1, AmpR	this study
pLF2202	pZE12G-luxR-gfp-luxR SL2 to SL1,2 miniRNA	ColE1, AmpR	this study
pLF2204	pZE12G-luxR-gfp-luxM SL1,2 to SL2-mCherry	ColE1, AmpR	this study
pLF2205	pZE12G-luxR-gfp-luxR SL2 to SL1,2-mCherry	ColE1, AmpR	this study
pLF2207	pZE12G-luxO-gfp-luxRbinding-mCherry*	ColE1, AmpR	this study
pLF2336	pZE12G-luxR-gfp-luxR-mCherry*	ColE1, AmpR	this study
pLF2338	pZE12G-luxR-gfp-luxM-mCherry*	ColE1, AmpR	this study
pLF898	pEVS143-Vh Qrr3	p15A, KanR	(Shao et al., 2013)
pLF2360	pEVS143-Vh Qrr3 SL1mut	p15A, KanR	this study
pLF2378	pEVS143-Vh Qrr3 SL1restore	p15A, KanR	this study
pLF1824	pLAFR2 with Ptac-mCherry-Kanr and Ptac-luxM-gfp-Cmr in the intergenic region downstream of luxCDABE locus	oriV, TetR, KanR, CmR	this study
pLF1825	pLAFR2 with Ptac-mCherry-Kanr and Ptac-luxR-gfp-Cmr in the intergenic region downstream of luxCDABE locus	oriV, TetR, KanR, CmR	this study
pLF1826	pLAFR2 with Ptac-mCherry-Kanr and Ptac-luxO-gfp-Cmr in the intergenic region downstream of luxCDABE locus	oriV, TetR, KanR, CmR	this study
pLF2238	pLAFR2 with luxR R17C-Cmr	oriV, TetR, CmR	this study
pLF2232	pLAFR2 with luxO 5'UTR-luxR R17C-Cmr	oriV, TetR, CmR	this study
pLF2236	pLAFR2 with luxM 5'UTR-luxR R17C-Cmr	oriV, TetR, CmR	this study
